# Supplementary material for: Heterogeneous biochars from agriculture residues and coal fly ash for the removal of heavy metals from coking wastewater
Source: Royal Society of Chemistry journal article supplement (doi:10.1039/c9ra02459j), 2019-01-01
Supplement: c9ra02459j1.pdf [file c9ra02459j1.pdf]

## Heterogeneous Biochars from Agriculture Residues and Coal Fly Ash for the Removal of Heavy Metals from Coking Wastewater

Lihui Gao<sup>1,2,3\*</sup> and Jillian L. Goldfarb<sup>2,3,4</sup>

1. School of Chemical Engineering and Technology, China University of Mining and Technology, Xuzhou 221116, People's Republic of China
2. Department of Mechanical Engineering, Division of Materials Science and Engineering, Boston University, 110 Cummington Mall, Boston MA 02215 USA
3. The Leone Family Department of Energy & Mineral Engineering, The EMS Energy Institute, and The Institutes of Energy and the Environment, The Pennsylvania State University, University Park, PA 16802, United States
4. Department of Biological and Environmental Engineering, Cornell University, 226 Riley-Robb Hall, Ithaca NY 14853

### Supplemental Information (for online publication only)

|            |                                                                                                                                     |     |
|------------|-------------------------------------------------------------------------------------------------------------------------------------|-----|
| Figure S1  | Image of coking wastewater prior to biological treatment                                                                            | S1  |
| Table S1   | Composition of wheat straw samples from across the globe as reported in the literature                                              | S2  |
| Table S2   | Representative proximate and ultimate analysis of global bituminous coals                                                           | S3  |
| Table S3   | Representative heavy metal contents in global samples of coal fly ashes from bituminous coals                                       | S4  |
| Table S4   | Results ICP-MS analysis of heavy metals present in coking wastewater before and after biological treatment                          | S5  |
| Figure S2  | XPS wide energy spectrums of biochar and activated carbon                                                                           | S6  |
| Figure S3  | C1s peaks of biochar and activated carbon                                                                                           | S7  |
| Figure S4  | Adsorption kinetic data of heavy metals to biochars and activated carbons                                                           | S8  |
| Table S5   | Adsorption kinetic data fit to pseudo-first order, pseudo-second order and intraparticle diffusion models ( $\pm 1$ standard error) | S9  |
| Table S6   | Adsorption isotherm data fit to Langmuir, Freundlich and Temkin models ( $\pm 1$ standard error)                                    | S10 |
| References |                                                                                                                                     | S11 |

---

\* To whom correspondence should be addressed: lihuigaocumt@163.com

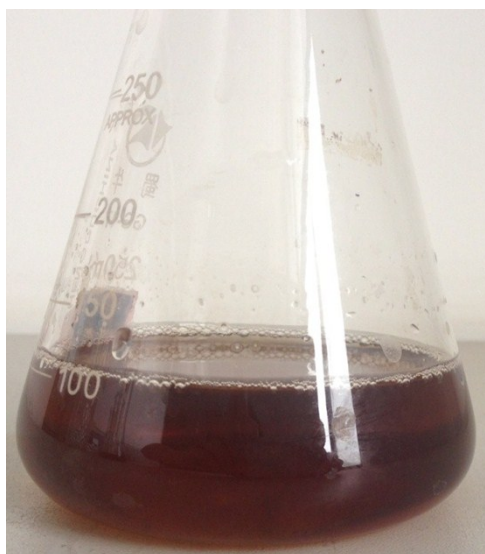

**Figure S1.** Image of coking wastewater prior to biological treatment

**Table S1.** Composition of wheat straw samples from across the globe as reported in the literature

|                           | USA (This Study)                | Australia <sup>1</sup> | Mexico <sup>2</sup> | Canada <sup>3</sup> | China <sup>4</sup> | China <sup>4</sup> | India <sup>5</sup> |
|---------------------------|---------------------------------|------------------------|---------------------|---------------------|--------------------|--------------------|--------------------|
| <i>Proximate Analysis</i> | <i>Average Wt % (dry basis)</i> |                        |                     |                     |                    |                    |                    |
| Volatile Matter           | 86.09 ± 0.79                    | 76.3                   | 68.23               | 77.04-79.85         | 63.96 ± 7.29       | 68.45              | 83.08              |
| Fixed Carbon              | 9.27 ± 0.89                     | 18.5                   | 14.72               | 16.76-18.15         | 14.96 ± 1.49       | 15.12              | 10.29              |
| Ash (Inorganic Matter)    | 4.64 ± 0.11                     | 5.2                    | 17.04               | 3.09-4.81           | 12.45 ± 9.02       | 6.29               | 6.63               |
| <i>Ultimate Analysis</i>  | <i>Average Wt % (dry basis)</i> |                        |                     |                     |                    |                    |                    |
| C                         | 53.94 ± 0.56                    | 46                     | 37.2                | 44.26 - 46.04       | 42.11 ± 2.12       | 50.02              | 38.34              |
| H                         | 5.93 ± 0.01                     | 5.92                   | 5.57                | 4.97 - 5.92         | 6.53 ± 0.46        | 5.33               | 5.47               |
| N                         | 0.70 ± 0.09                     | 1.42                   | 1.14                | 0.34 - 1.16         | 0.58 ± 0.28        | 0.67               | 0.60               |
| O                         | 39.32 ± 0.63                    | 41.3                   | 37.3                | 43.79 - 44.48       | 40.51 ± 2.67       | 43.75              | 55.22              |
| S                         | 0.11 ± 0.01                     | 0.15                   | 0.2                 | 0.08 - 0.13         | 0.32 ± 0.10        | 0.23               | 0.37               |

**Table S2.** Representative proximate and ultimate analysis of global bituminous coals

|                           | Venezuela<br>(This<br>Study) | Pennsylvania<br>USA <sup>6</sup> | Henan Province, China <sup>7</sup> |       |       | Shaanxi,<br>China <sup>7</sup> |
|---------------------------|------------------------------|----------------------------------|------------------------------------|-------|-------|--------------------------------|
| <i>Proximate Analysis</i> |                              | <i>Average Wt % (dry basis)</i>  |                                    |       |       |                                |
| Volatile Matter           | 36.3                         | 32.18                            | 41.49                              | 37.91 | 35.98 | 30.56                          |
| Fixed Carbon              | 63.63                        | 60.88                            | 39.23                              | 43.63 | 44.22 | 49.88                          |
| Ash (Inorganic Matter)    | 0.07                         | 6.93                             | 18.51                              | 17.30 | 18.75 | 15.38                          |
| <i>Ultimate Analysis</i>  |                              | <i>Average Wt % (dry basis)</i>  |                                    |       |       |                                |
| C                         | 76.9                         | 76.28                            | 68.95                              | 68.88 | 67.03 | 79.31                          |
| H                         | 5.36                         | 5.33                             | 5.14                               | 5.45  | 5.34  | 4.72                           |
| N                         | 1.35                         | 1.42                             | 1.11                               | 0.13  | 1.09  | 1.03                           |
| O                         | 8.74                         | 7.65                             | 5.52                               | 7.08  | 6.74  | 13.38                          |
| S                         | 0.64                         | 1.73                             |                                    |       |       | 1.30                           |
| HHV (MJ/kg)               | 28.85                        | 30.93                            |                                    |       |       | 25.44                          |

**Table S3.** Representative heavy metal contents in global samples of coal fly ashes from bituminous coals

| <i>Wt % in Fly Ash</i> | <b>Venezuela (This Study)</b> |         | <b>Huaibei, China<sup>8*</sup></b> |       | <b>Poland<sup>9*</sup></b> | <b>Canada<sup>10*</sup></b> |       |
|------------------------|-------------------------------|---------|------------------------------------|-------|----------------------------|-----------------------------|-------|
| Al                     | 12.93                         | ± 3.18  | 15.25                              | 17.78 | 8.16                       | 12.01                       | 10.21 |
| Ba                     | 1.65                          | ± 0.08  |                                    |       |                            | 0.21                        | 0.15  |
| Br                     | 0.42                          | ± 0.07  |                                    |       |                            |                             |       |
| Ca                     | 1.38                          | ± 3.01  | 3.96                               | 3.81  | 6.19                       | 1.84                        | 2.07  |
| Cr                     |                               |         |                                    |       |                            | 0.03                        | 0.02  |
| Fe                     | 1.49                          | ± 2.64  | 4.82                               | 6.22  | 4.34                       | 2.52                        | 2.98  |
| K                      | 1.54                          | ± 3.65  | 0.64                               | 1.00  | 1.37                       | 1.92                        | 1.62  |
| Mg                     | 0.46                          | ± 0.77  | 1.20                               | 0.80  | 2.84                       | 0.67                        | 0.69  |
| Mn                     | 0.05                          | ± 0.01  |                                    |       | 0.02                       | 0.03                        |       |
| Na                     | 4.94                          | ± 7.69  | 0.52                               | 0.33  | 1.61                       | 0.37                        | 0.30  |
| Ni                     |                               |         |                                    |       |                            | 0.01                        | 0.01  |
| P                      | 0.49                          | ± 0.03  | 0.23                               | 0.18  | 0.38                       | 0.20                        | 0.10  |
| S                      | 2.36                          | ± 3.39  | 1.36                               | 1.49  | 1.69                       | 0.25                        | 0.24  |
| Si                     | 8.48                          | ± 0.08  | 24.75                              | 22.14 | 10.92                      | 26.18                       | 27.03 |
| Sr                     |                               |         |                                    |       |                            | 0.29                        | 0.03  |
| Ti                     | 12.39                         | ± 10.05 | 0.80                               | 0.81  | 0.46                       | 0.55                        | 0.44  |
| V                      |                               |         |                                    |       |                            | 0.02                        | 0.02  |

  

| <i>Wt % in Fly Ash</i> | <b>U.S.-Fired Coals<sup>11</sup></b> |       |       |       |       |
|------------------------|--------------------------------------|-------|-------|-------|-------|
| Al                     | 12.34                                | 14.32 | 13.87 | 15.44 | 9.80  |
| Ba                     | 0.05                                 | 0.08  | 0.12  | 0.08  | 0.05  |
| Br                     |                                      |       |       |       |       |
| Ca                     | 1.94                                 | 0.88  | 1.21  | 0.44  | 1.80  |
| Cr                     |                                      |       |       |       |       |
| Fe                     | 10.28                                | 9.68  | 10.16 | 2.25  | 24.37 |
| K                      | 1.34                                 | 1.91  | 2.00  | 2.19  | 0.98  |
| Mg                     | 0.43                                 | 0.46  | 0.47  | 0.48  | 0.37  |
| Mn                     |                                      |       |       |       |       |
| Na                     | 0.35                                 | 0.13  | 0.10  | 0.18  | 0.26  |
| Ni                     |                                      |       |       |       |       |
| P                      | 0.21                                 | 0.11  | 0.10  | 0.05  | 0.06  |
| S                      | 0.40                                 | 0.27  | 0.23  | 0.02  | 0.32  |
| Si                     | 21.76                                | 22.66 | 23.42 | 26.84 | 19.23 |
| Sr                     |                                      |       |       |       |       |
| Ti                     | 0.79                                 | 0.95  | 0.99  | 1.17  | 0.55  |
| V                      |                                      |       |       |       |       |

\*Calculated from chemical composition of minerals

**Table S4.** Results ICP-MS analysis of heavy metals present in coking wastewater before and after biological treatment

|                                  | As (ppm)    | Cd (ppm)    | Co (ppm)    | Cr (ppm)     | Cu (ppm)    |
|----------------------------------|-------------|-------------|-------------|--------------|-------------|
| Coking wastewater                | 0.101±0.414 | 0.101±0.342 | 1.049±0.159 | 0.107±0.247  | 0.549±0.136 |
| Water after Biological Treatment | 0.035±1.287 | 0.028±0.310 | 0.107±0.075 | 0.010±0.251  | 0.861±0.454 |
|                                  | Mn (ppm)    | Ni (ppm)    | Pb (ppm)    | Se (ppm)*    | Zn (ppm)    |
| Coking wastewater                | 2.482±0.205 | 0.798±0.136 | 0.036±0.291 | 69.422±0.155 | 1.364±0.243 |
| Water after Biological Treatment | 0.748±0.120 | 0.077±0.180 | 0.084±0.350 | 13.031±0.332 | 1.368±0.231 |

\* Note: high energy He mode not utilized; Se reported only for presence, but given Ar-Ar dimer interference, Se was not selected as model compound in adsorption experiments

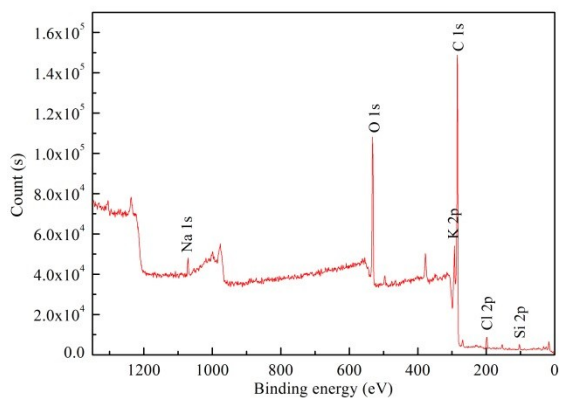

a. Py\_WS

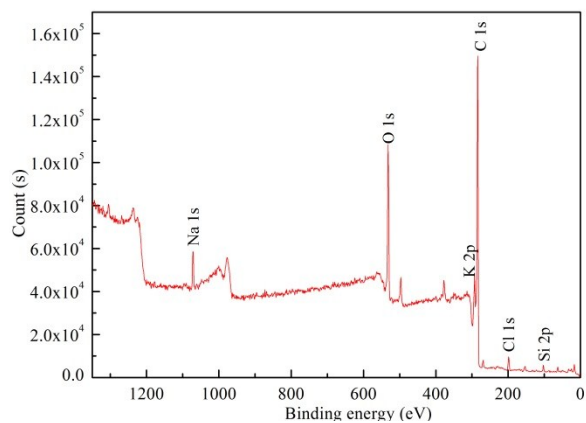

b. Py\_WS\_FA(20:1)

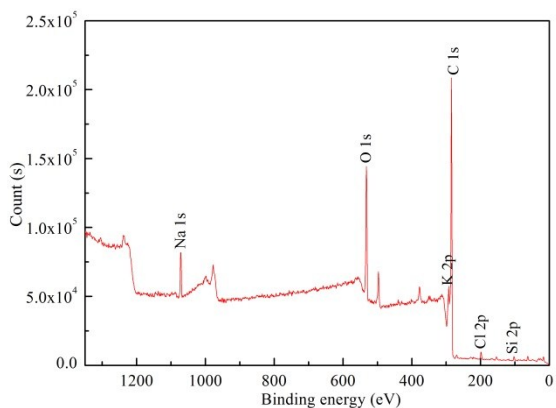

c. Py\_WS\_FA(10:1)

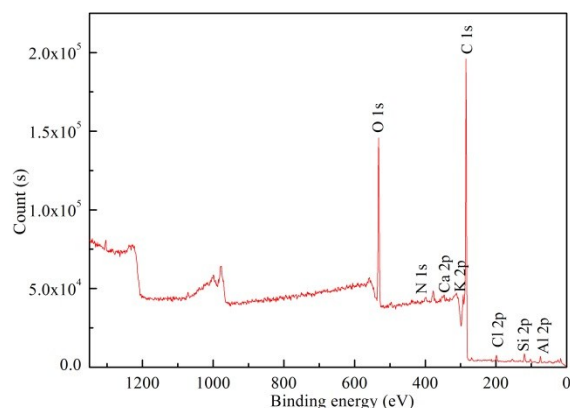

d. AC\_WS

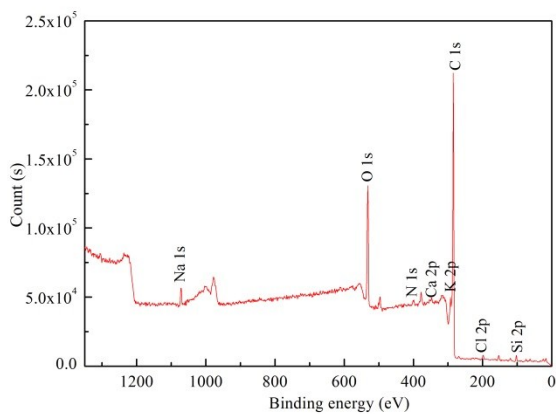

e. AC\_WS\_FA(20:1)

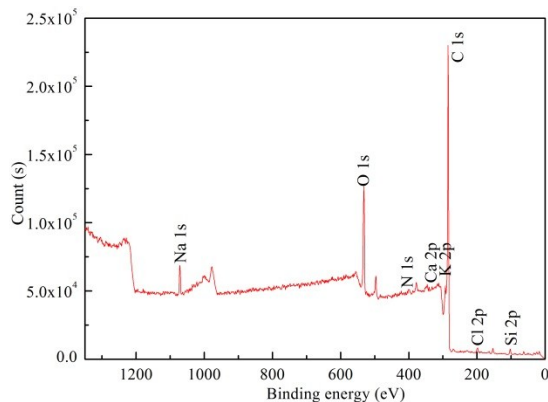

f. AC\_WS\_FA(10:1)

**Figure S2.** XPS wide energy spectrums of biochar and activated carbon

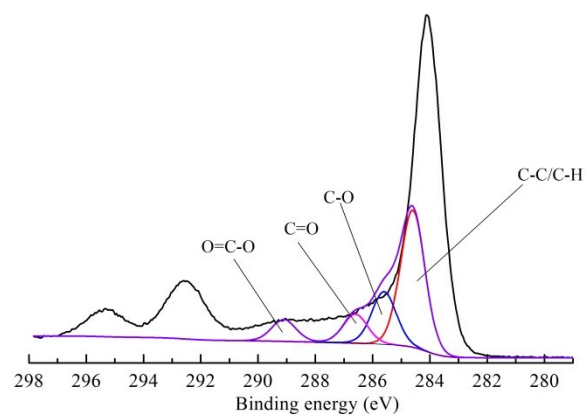

a. Py\_WS

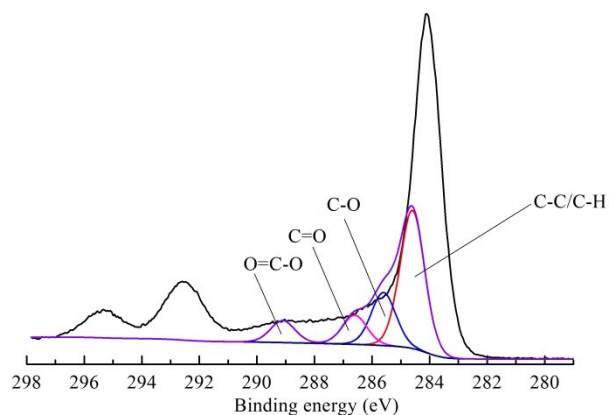

b. Py\_WS\_FA(20:1)

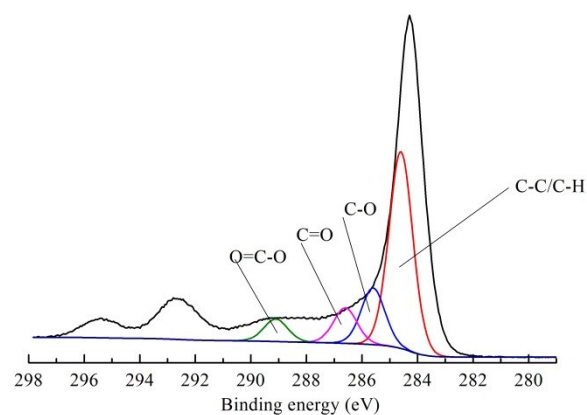

c. Py\_WS\_FA(10:1)

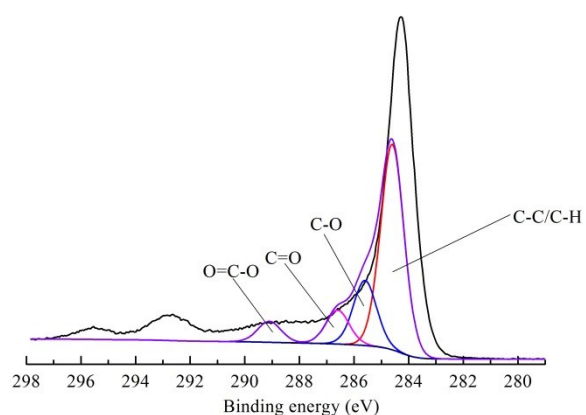

d. AC\_WS

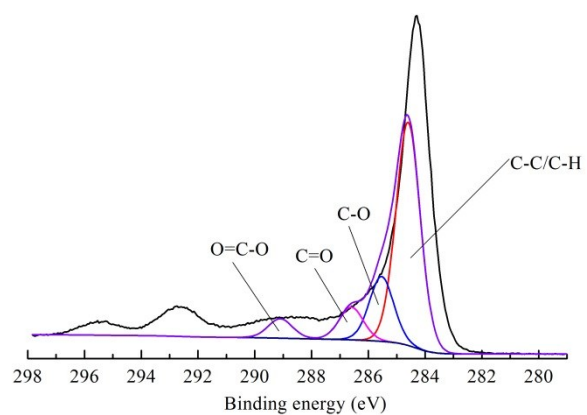

e. AC\_WS\_FA(20:1)

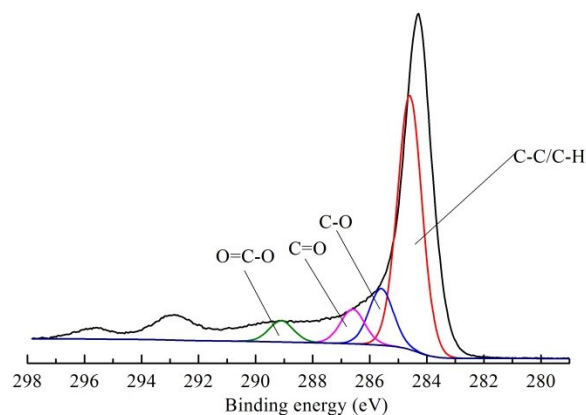

f. AC\_WS\_FA(10:1)

**Figure S3.** C1s peaks of biochar and activated carbon



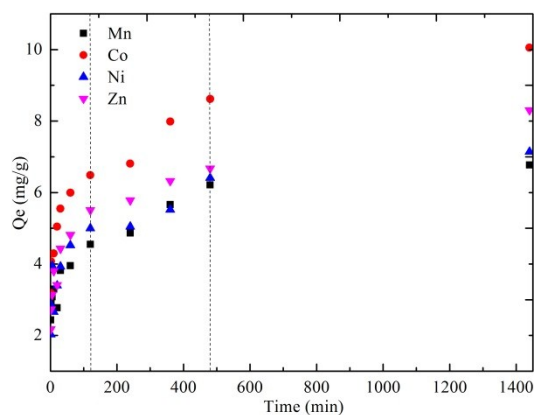

a. Py\_WS

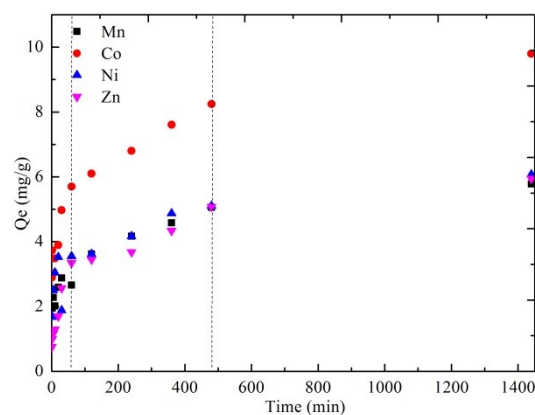

b. Py\_WS\_FA(20:1)

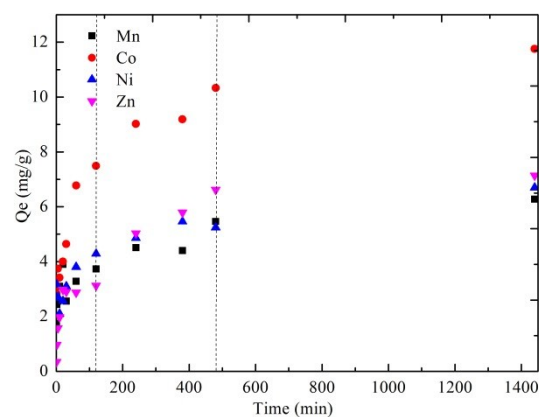

c. Py\_WS\_FA(10:1)

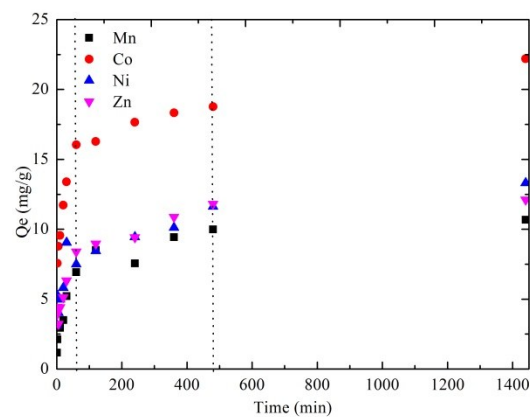

d. AC\_WS

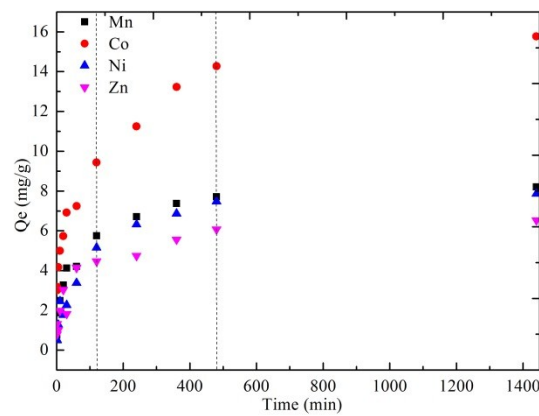

e. AC\_WS\_FA(20:1)

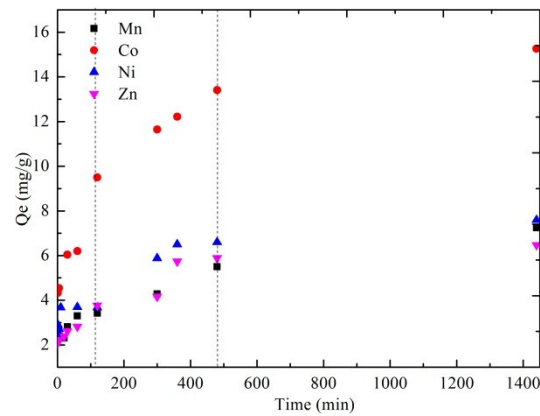

f. AC\_WS\_FA(10:1)

**Figure S4.** Adsorption kinetic data of heavy metals to biochars and activated carbons

**Table S3.** Adsorption kinetic data fit to pseudo-first order, pseudo-second order and intraparticle diffusion models ( $\pm 1$  standard error)

| Biochar        | Metal | Pseudo-first-order kinetic |                 |       | Pseudo-second-order kinetic |                 |       | Intraparticle diffusion            |            |       |
|----------------|-------|----------------------------|-----------------|-------|-----------------------------|-----------------|-------|------------------------------------|------------|-------|
|                |       | $K_1$ (1/min)              | $q_{e1}$ (mg/g) | $R^2$ | $K_2$ (g/mg min)            | $q_{e2}$ (mg/g) | $R^2$ | $K_i$ (mg/(g/min <sup>0.5</sup> )) | $D$ (mg/g) | $R^2$ |
| Py_WS          | Mn    | 3.75E-03                   | 3.845           | 0.965 | 4.45E-03                    | 6.802           | 0.995 | 1.23E-01                           | 2.852      | 0.903 |
|                | Co    | 2.85E-03                   | 5.683           | 0.943 | 2.62E-03                    | 10.030          | 0.991 | 1.82E-01                           | 4.017      | 0.923 |
|                | Ni    | 3.16E-03                   | 3.936           | 0.943 | 4.03E-03                    | 7.138           | 0.991 | 1.28E-01                           | 2.972      | 0.850 |
|                | Zn    | 2.49E-03                   | 4.819           | 0.886 | 2.92E-03                    | 8.246           | 0.989 | 1.57E-01                           | 3.046      | 0.906 |
| Py_WS_FA(20:1) | Mn    | 3.37E-03                   | 3.700           | 0.967 | 4.12E-03                    | 5.809           | 0.992 | 1.21E-01                           | 1.917      | 0.901 |
|                | Co    | 2.90E-03                   | 6.006           | 0.947 | 2.42E-03                    | 9.787           | 0.991 | 1.95E-01                           | 3.399      | 0.919 |
|                | Ni    | 2.87E-03                   | 3.617           | 0.888 | 3.75E-03                    | 6.088           | 0.990 | 1.17E-01                           | 2.203      | 0.840 |
|                | Zn    | 3.23E-03                   | 4.407           | 0.913 | 2.93E-03                    | 5.988           | 0.986 | 1.46E-01                           | 1.266      | 0.884 |
| Py_WS_FA(10:1) | Mn    | 3.10E-03                   | 3.639           | 0.915 | 4.35E-03                    | 6.321           | 0.995 | 1.13E-01                           | 2.445      | 0.850 |
|                | Co    | 3.55E-03                   | 7.872           | 0.940 | 2.02E-03                    | 11.817          | 0.994 | 2.67E-01                           | 3.442      | 0.887 |
|                | Ni    | 2.54E-03                   | 3.848           | 0.895 | 3.95E-03                    | 6.754           | 0.994 | 1.22E-01                           | 2.557      | 0.904 |
|                | Zn    | 4.48E-03                   | 5.642           | 0.907 | 2.95E-03                    | 7.254           | 0.996 | 1.86E-01                           | 1.434      | 0.841 |
| AC_WS          | Mn    | 5.10E-03                   | 7.140           | 0.914 | 3.34E-03                    | 10.806          | 0.999 | 2.64E-01                           | 3.000      | 0.771 |
|                | Co    | 3.15E-03                   | 12.216          | 0.854 | 1.55E-03                    | 22.090          | 0.995 | 4.31E-01                           | 8.762      | 0.829 |
|                | Ni    | 3.21E-03                   | 8.422           | 0.948 | 1.78E-03                    | 13.342          | 0.991 | 2.72E-01                           | 4.505      | 0.905 |
|                | Zn    | 6.03E-03                   | 7.763           | 0.944 | 3.12E-03                    | 12.238          | 0.998 | 2.63E-01                           | 4.552      | 0.807 |
| AC_WS_FA(20:1) | Mn    | 5.35E-03                   | 5.827           | 0.976 | 3.64E-03                    | 8.332           | 0.998 | 2.09E-01                           | 2.258      | 0.809 |
|                | Co    | 4.21E-03                   | 11.456          | 0.976 | 1.41E-03                    | 15.982          | 0.998 | 3.80E-01                           | 4.123      | 0.893 |
|                | Ni    | 5.77E-03                   | 6.594           | 0.986 | 2.40E-03                    | 8.111           | 0.997 | 2.28E-01                           | 1.339      | 0.827 |
|                | Zn    | 4.74E-03                   | 4.717           | 0.937 | 3.65E-03                    | 6.627           | 0.995 | 1.66E-01                           | 1.641      | 0.800 |
| AC_WS_FA(10:1) | Mn    | 1.91E-03                   | 4.684           | 0.943 | 2.02E-03                    | 7.266           | 0.974 | 1.31E-01                           | 2.258      | 0.949 |
|                | Co    | 3.56E-03                   | 10.387          | 0.972 | 1.34E-03                    | 15.423          | 0.992 | 3.35E-01                           | 4.560      | 0.883 |
|                | Ni    | 3.55E-03                   | 4.830           | 0.972 | 3.56E-03                    | 7.628           | 0.995 | 1.55E-01                           | 2.619      | 0.902 |
|                | Zn    | 3.63E-03                   | 4.372           | 0.904 | 4.10E-03                    | 6.565           | 0.995 | 1.37E-01                           | 2.078      | 0.885 |

**Table S4.** Adsorption isotherm data fit to Langmuir, Freundlich and Temkin models ( $\pm 1$  standard error)

| Biochar        | Metals | Langmuir     |              |       | Freundlich                                  |       |       | Temkin        |          |       |
|----------------|--------|--------------|--------------|-------|---------------------------------------------|-------|-------|---------------|----------|-------|
|                |        | $K_L$ (L/mg) | $Q_m$ (mg/g) | $R^2$ | $K_f$ (mg <sup>1-n</sup> L <sup>n</sup> /g) | n     | $R^2$ | $K_T$ (L/mol) | B(J/mol) | $R^2$ |
| Py_WS          | Mn     | 1.70E-02     | 6.316        | 0.997 | 1.128                                       | 3.949 | 0.952 | 4.13E-01      | 1.026    | 0.989 |
|                | Co     | 2.20E-03     | 37.405       | 0.998 | 0.456                                       | 1.724 | 0.983 | 2.65E-02      | 7.682    | 0.977 |
|                | Ni     | 9.10E-03     | 13.000       | 0.994 | 0.836                                       | 2.473 | 0.989 | 1.11E-01      | 2.571    | 0.978 |
|                | Zn     | 4.14E-03     | 14.951       | 0.998 | 0.213                                       | 1.607 | 0.993 | 5.24E-02      | 3.039    | 0.957 |
| Py_WS_FA(20:1) | Mn     | 7.53E-03     | 9.058        | 0.997 | 0.353                                       | 2.032 | 0.961 | 8.15E-02      | 1.913    | 0.988 |
|                | Co     | 2.12E-03     | 32.741       | 0.997 | 0.367                                       | 1.672 | 0.982 | 2.63E-02      | 6.614    | 0.981 |
|                | Ni     | 8.33E-03     | 11.336       | 0.995 | 0.366                                       | 1.828 | 0.970 | 8.33E-02      | 2.494    | 0.986 |
|                | Zn     | 3.72E-03     | 17.714       | 0.999 | 0.197                                       | 1.495 | 0.987 | 5.05E-02      | 3.434    | 0.975 |
| Py_WS_FA(10:1) | Mn     | 5.20E-03     | 10.752       | 0.992 | 0.260                                       | 1.817 | 0.977 | 6.15E-02      | 2.189    | 0.976 |
|                | Co     | 1.95E-03     | 32.650       | 0.997 | 0.316                                       | 1.626 | 0.980 | 2.50E-02      | 6.487    | 0.981 |
|                | Ni     | 1.03E-02     | 9.151        | 0.996 | 0.385                                       | 1.951 | 0.954 | 9.69E-02      | 2.055    | 0.987 |
|                | Zn     | 3.80E-03     | 13.418       | 0.996 | 0.165                                       | 1.541 | 0.977 | 4.93E-02      | 2.671    | 0.979 |
| AC_WS          | Mn     | 2.65E-03     | 21.686       | 0.992 | 0.168                                       | 1.436 | 0.816 | 4.23E-02      | 3.865    | 0.853 |
|                | Co     | 1.34E-03     | 45.410       | 0.999 | 0.215                                       | 1.431 | 0.986 | 2.06E-02      | 8.283    | 0.977 |
|                | Ni     | 4.30E-03     | 18.646       | 0.999 | 0.221                                       | 1.471 | 0.969 | 5.69E-02      | 3.613    | 0.996 |
|                | Zn     | 1.75E-03     | 34.078       | 0.993 | 0.120                                       | 1.255 | 0.977 | 3.89E-02      | 4.914    | 0.986 |
| AC_WS_FA(20:1) | Mn     | 4.27E-03     | 16.086       | 0.995 | 0.271                                       | 1.664 | 0.966 | 5.44E-02      | 3.198    | 0.957 |
|                | Co     | 1.03E-03     | 60.155       | 0.994 | 0.289                                       | 1.484 | 0.978 | 1.22E-02      | 12.033   | 0.994 |
|                | Ni     | 4.63E-03     | 16.858       | 0.993 | 0.287                                       | 1.640 | 0.990 | 5.75E-02      | 3.395    | 0.983 |
|                | Zn     | 1.12E-03     | 41.156       | 0.991 | 0.097                                       | 1.228 | 0.993 | 2.16E-02      | 5.880    | 0.981 |
| AC_WS_FA(10:1) | Mn     | 4.24E-03     | 13.446       | 0.996 | 0.222                                       | 1.656 | 0.982 | 5.34E-02      | 2.690    | 0.979 |
|                | Co     | 1.08E-03     | 54.453       | 0.991 | 0.191                                       | 1.377 | 0.992 | 1.90E-02      | 9.176    | 0.946 |
|                | Ni     | 3.78E-03     | 18.804       | 0.994 | 0.210                                       | 1.493 | 0.986 | 5.04E-02      | 3.683    | 0.973 |
|                | Zn     | 1.27E-03     | 43.458       | 0.995 | 0.102                                       | 1.210 | 0.997 | 3.44E-02      | 5.517    | 0.918 |

## References

- (1) Mulligan, C. J.; Strezov, L.; Strezov, V. Thermal Decomposition of Wheat Straw and Mallee Residue under Pyrolysis Conditions. In *Energy and Fuels*; 2010; Vol. 24, pp 46–52. <https://doi.org/10.1021/ef9004797>.
- (2) Montero, G.; Coronado, M. A.; Torres, R.; Jaramillo, B. E.; García, C.; Stoytcheva, M.; Vázquez, A. M.; León, J. A.; Lambert, A. A.; Valenzuela, E. Higher Heating Value Determination of Wheat Straw from Baja California, Mexico. *Energy* **2016**, *109*, 612–619. <https://doi.org/10.1016/j.energy.2016.05.011>.
- (3) Ghaly, A. E.; Al-Taweel, A. Physical and Thermochemical Properties of Cereal Straws. *Energy Sources* **1990**, *12* (2), 131–145. <https://doi.org/10.1080/00908319008960195>.
- (4) Cuiping, L.; Chuangzhi, W.; Yanyongjie; Haitao, H. Chemical Elemental Characteristics of Biomass Fuels in China. *Biomass and Bioenergy* **2004**, *27* (2), 119–130. <https://doi.org/10.1016/j.biombioe.2004.01.002>.
- (5) Biswas, B.; Pandey, N.; Bisht, Y.; Singh, R.; Kumar, J.; Bhaskar, T. Pyrolysis of Agricultural Biomass Residues: Comparative Study of Corn Cob, Wheat Straw, Rice Straw and Rice Husk. *Bioresour. Technol.* **2017**, *237*, 57–63. <https://doi.org/10.1016/j.biortech.2017.02.046>.
- (6) Goldfarb, J. L.; Ceylan, S. Second-Generation Sustainability: Application of the Distributed Activation Energy Model to the Pyrolysis of Locally Sourced Biomass-Coal Blends for Use in Co-Firing Scenarios. *Fuel* **2015**, *160*, 297–308. <https://doi.org/10.1016/j.fuel.2015.07.071>.
- (7) Yu, Y.; Xu, M.; Yao, H.; Yu, D.; Qiao, Y.; Sui, J.; Liu, X.; Cao, Q. Char Characteristics and Particulate Matter Formation during Chinese Bituminous Coal Combustion. *Proc. Combust. Inst.* **2007**, *31 II* (2), 1947–1954. <https://doi.org/10.1016/j.proci.2006.07.116>.
- (8) Liu, G.; Vassilev, S. V.; Gao, L.; Zheng, L.; Peng, Z. Mineral and Chemical Composition and Some Trace Element Contents in Coals and Coal Ashes from Huaibei Coal Field, China. *Energy Convers. Manag.* **2005**, *46* (13–14), 2001–2009. <https://doi.org/10.1016/j.enconman.2004.11.002>.
- (9) Koukouzas, N.; Hämäläinen, J.; Papanikolaou, D.; Tourunen, A.; Jäntti, T. Mineralogical and Elemental Composition of Fly Ash from Pilot Scale Fluidised Bed Combustion of Lignite, Bituminous Coal, Wood Chips and Their Blends. *Fuel* **2007**, *86* (14 SPEC. ISS.), 2186–2193. <https://doi.org/10.1016/j.fuel.2007.03.036>.
- (10) Goodarzi, F. Characteristics and Composition of Fly Ash from Canadian Coal-Fired Power Plants. *Fuel* **2006**, *85* (10–11), 1418–1427. <https://doi.org/10.1016/j.fuel.2005.11.022>.
- (11) Kutchko, B. G.; Kim, A. G. Fly Ash Characterization by SEM-EDS. *Fuel* **2006**, *85* (17–18), 2537–2544. <https://doi.org/10.1016/j.fuel.2006.05.016>.
